# Supplementary material
Source: HighWire-hosted journal article supplement (https://www.annfammed.org/highwire/filestream/26562/field_highwire_adjunct_files/0/King.pdf)
Supplement: King.pdf [file King.pdf]

# Health-Related Social Needs Following Onset of the COVID-19 Pandemic in Oregon

*Source:* King A, Larson JH, Steeves-Reece  
Al, Major-McDowall Z, Goldberg B.  
Health-related social needs following  
onset of the COVID-19 pandemic in  
Oregon. *Ann Fam Med.*  
2024;22:10.1370/afm.3167

*HRSN of Medicare and Medicaid beneficiaries, such as housing and food, during the COVID-19 pandemic significantly increased.*

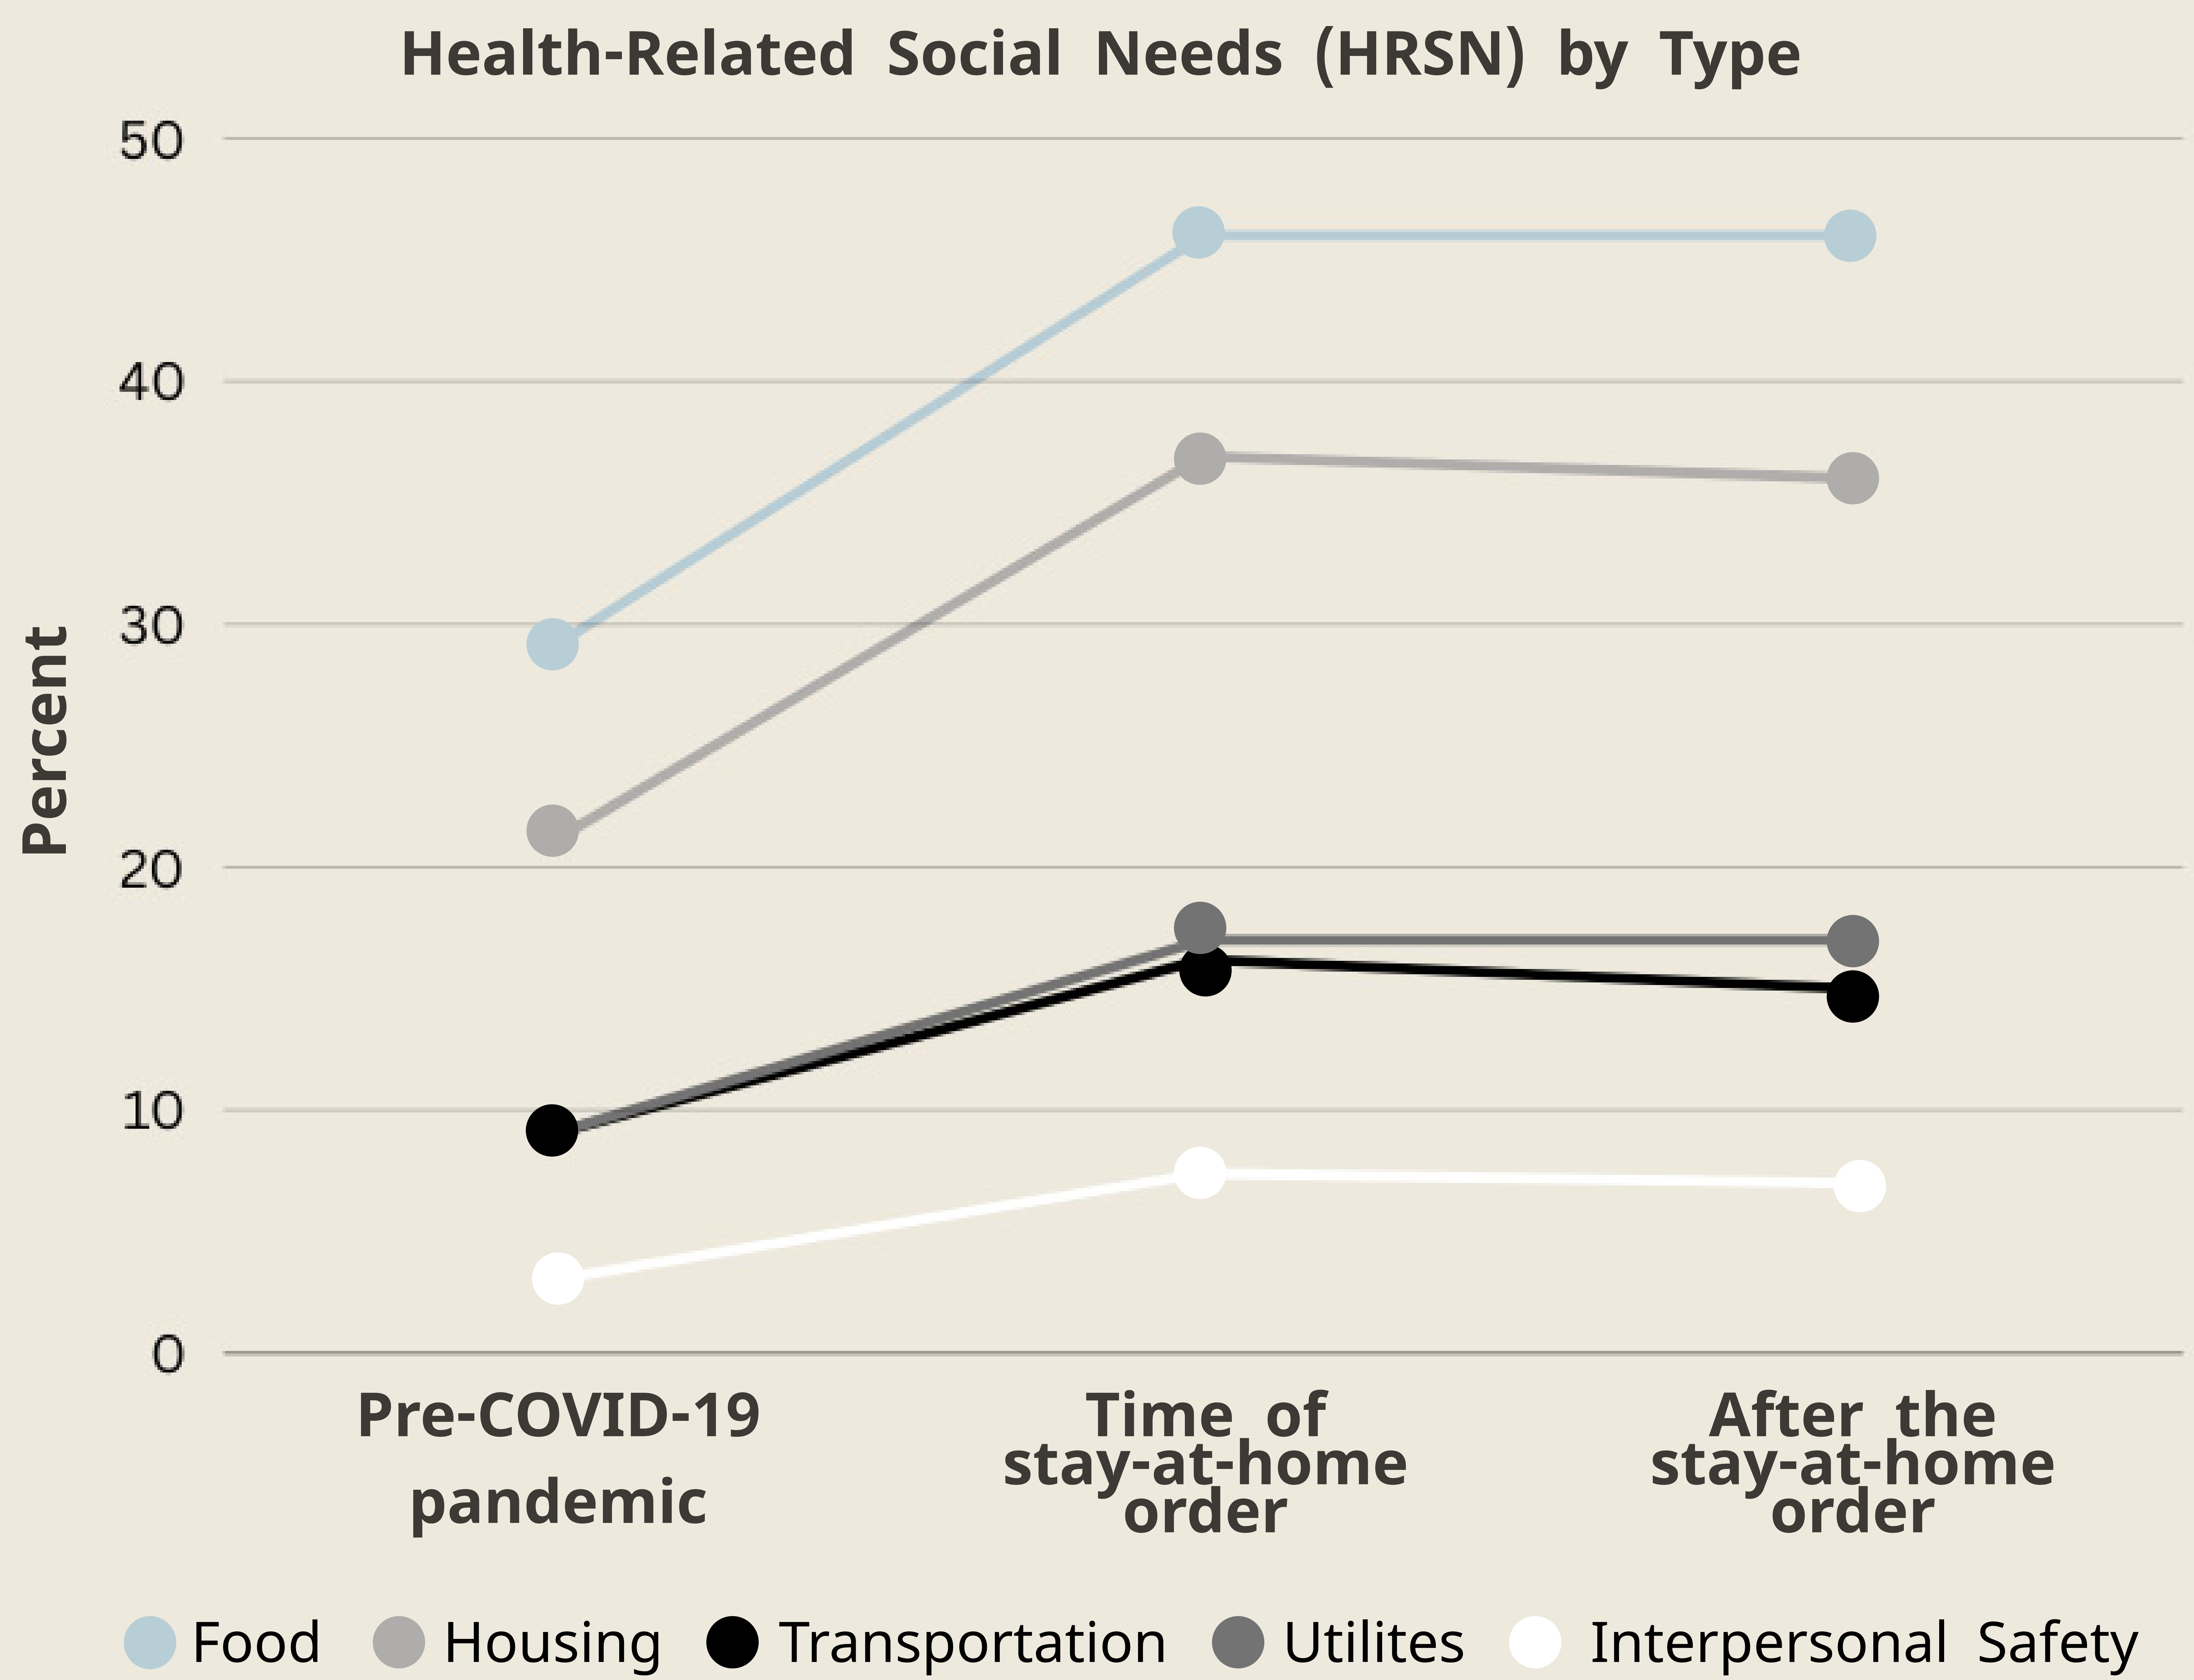

## Key Findings

- Data collected before and after Oregon's COVID-19 stay-at-home order demonstrated a 17.7-percentage point increase in overall HRSN among Medicare and Medicaid beneficiaries.
- This trend is was seen across all five components of HRSN: housing, food security, transportation, utilities, and interpersonal safety.

## Conclusion

- The surge in HRSN following the pandemic underscores the necessity for enhanced understanding of effective public health interventions, investments, and policies.
